# Supplementary material
Source: MDPI journal article supplement (https://www.mdpi.com/2624-862X/4/4/45)
Supplement: s1 [file s1]

**Supplementary Table S1. Diversity of aerobic spore-forming bacteria present in raw milk obtained from four farms over two seasons**

| Farm, Seasons  | Number of isolates | Closest related described species             | Maximum Identity (%)# | GenBank Accession Number |
|----------------|--------------------|-----------------------------------------------|-----------------------|--------------------------|
| Farm 1, Summer | 19                 | <i>B. licheniformis</i> (T); ATCC 14580       | 100                   | CP000002                 |
|                | 6                  | <i>B. licheniformis</i> (T); ATCC 14580       | 100                   | CP000002                 |
|                | 1                  | <i>B. licheniformis</i> (T); ATCC 14580       | 100                   | CP000002                 |
|                | 1                  | <i>B. licheniformis</i> (T); ATCC 14580       | 100                   | CP000002                 |
|                | 2                  | <i>B. pumilus</i> (T); ATCC 7061              | 99.6                  | AY876289                 |
|                | 1                  | <i>Paenibacillus marinisediminis</i> (T); LHW | 97                    | JF748731                 |
| Farm 1, Winter | 14                 | <i>B. licheniformis</i> (T); ATCC 14580       | 100                   | CP000002                 |
|                | 4                  | <i>B. licheniformis</i> (T); ATCC 14580       | 100                   | CP000002                 |
|                | 2                  | <i>B. licheniformis</i> (T); ATCC 14580       | 100                   | CP000002                 |
|                | 2                  | <i>B. licheniformis</i> (T); ATCC 14580       | 100                   | CP000002                 |
|                | 2                  | <i>Paenibacillus xylanexedens</i> (T); B22a   | 98.5                  | EU558281                 |
|                | 1                  | <i>B. clausii</i> (T); DSM 8716               | 99.3                  | X76440                   |
|                | 1                  | <i>Paenibacillus peoriae</i> (T); DSM 8320    | 99.4                  | AJ320494                 |
|                | 2                  | <i>B. mycoides</i> (T); ATCC 6462             | 99.6                  | AB021192                 |
|                | 1                  | <i>B. altitudinis</i> (T); 41KF2b             | 99.8                  | AJ831842                 |
|                | 3                  | <i>B. circulans</i> (T); ATCC 4513            | 99.6                  | AY724690                 |
|                | 1                  | <i>Solibacillus silvestris</i> (T); HR3-23    | 99.6                  | AP012157                 |
| Farm 2, Summer | 20                 | <i>B. licheniformis</i> (T); ATCC 14580       | 100                   | CP000002                 |
| Farm 2, Winter | 6                  | <i>B. licheniformis</i> (T); ATCC 14580       | 100                   | CP000002                 |
|                | 1                  | <i>B. pumilus</i> (T); ATCC 7061              | 99.4                  | AY876289                 |

|                |    |                                                      |      |          |
|----------------|----|------------------------------------------------------|------|----------|
|                | 1  | <i>B. pumilus</i> (T); ATCC 7061                     | 100  | AY876289 |
|                | 1  | <i>B. kochii</i> (T); WCC 458                        | 98.2 | FN995265 |
|                | 1  | <i>Solibacillus silvestris</i> (T); HR3-23           | 99   | AJ006086 |
|                | 1  | <i>B. rigui</i> (T); WPCB074                         | 97   | EU939689 |
|                | 1  | <i>Sporosarcina luteola</i> (T); Y1                  | 98   | AB473560 |
|                | 1  | <i>Paenibacillus polymyxa</i> (T); IAM 13419         | 99   | D16276   |
| Farm 3, Summer | ND | ND                                                   | ND   | ND       |
| Farm 3, Winter | 6  | <i>B. licheniformis</i> (T); ATCC 14580              | 100  | CP000002 |
|                | 2  | <i>B. licheniformis</i> (T); ATCC 14580              | 100  | CP000002 |
|                | 1  | <i>B. clausii</i> (T); DSM 8716                      | 99   | X76440   |
|                | 4  | <i>B. pumilus</i> (T); ATCC 7061                     | 100  | AY876289 |
|                | 1  | <i>Ornithinibacillus bavariensis</i> (T); WSBC 24001 | 98   | Y13066   |
|                | 3  | <i>B. pumilus</i> (T); ATCC 7061                     | 100  | AY876289 |
|                | 1  | <i>B. cereus</i> (T); ATCC 14579                     | 99   | AE016877 |
|                | 4  | <i>B. clausii</i> (T); DSM 8716                      | 99.3 | X76440   |
|                | 2  | <i>Paenibacillus amylolyticus</i> (T); NRS-290T      | 99   | D85396   |
| Farm 4, Summer | 8  | <i>B. licheniformis</i> (T); ATCC 14580              | 100  | CP000002 |
|                | 11 | <i>B. licheniformis</i> (T); ATCC 14580              | 100  | CP000002 |
|                | 3  | <i>B. subtilis</i> (T); DSM10                        | 99   | AJ276351 |
|                | 5  | <i>B. clausii</i> (T); DSM 8716- 97.7%               | 99   | X76440   |
|                | 3  | <i>Penibacillus timonensis</i> (T); 2301032          | 98   | AY323612 |
|                | 3  | <i>Lysinibacillus fusiformis</i> (T); DSM 28         | 98   | AJ310084 |
|                | 1  | <i>B. kochii</i> (T); type strain: WCC 4582          | 99   | CP000002 |
| Farm 4, Winter | 14 | <i>B. licheniformis</i> (T); ATCC 14580              | 100  | CP000002 |
|                | 2  | <i>B. licheniformis</i> (T); ATCC 14580              | 100  | CP000002 |
|                | 1  | <i>B. altitudinis</i> (T); 41KF2b                    | 99.2 | AJ831842 |
|                | 2  | <i>B. simplex</i> (T); DSM 1321T                     | 98.2 | AJ439078 |

|  |   |                                               |      |          |
|--|---|-----------------------------------------------|------|----------|
|  | 2 | <i>B. simplex</i> (T); DSM 1321T              | 98.9 | AJ439078 |
|  | 4 | <i>B. kochii</i> (T); WCC 4582                | 98.8 | FN995265 |
|  | 2 | <i>Lysinibacillus fusiformis</i> (T); DSM 28  | 98.2 | AJ310084 |
|  | 1 | <i>Penibacillus cookii</i> (T); LMG 18419     | 100  | AJ250317 |
|  | 2 | <i>B. clausii</i> (T); DSM 8716-99.2%         | 99.2 | X76440   |
|  | 1 | <i>B. pocheonensis</i> (T); Gsoil 420         | 96   | AB245377 |
|  | 1 | <i>Penibacillus lactis</i> (T); MB 1871-98.6% | 100  | AY257868 |

The table depicts the sequence similarity to the closest related bacterial type strains. #The similarity has been verified using 16s rRNA sequencing and depicted in percentage. ND- not detected or under detectable numbers. Each of the isolate included in this table is a representative of different ERIC profiles obtained.

**Supplementary Table S2. Presence of different aerobic spore forming bacteria in raw milk from each farm over two seasons**

| Aerobic spore forming bacteria             | Number (%)of various aerobic spore forming bacteria |             |        |               |               |              |              |              |
|--------------------------------------------|-----------------------------------------------------|-------------|--------|---------------|---------------|--------------|--------------|--------------|
|                                            | Summer                                              |             |        |               | Winter        |              |              |              |
|                                            | Farm 1                                              | Farm 2      | Farm 3 | Farm 4        | Farm 1        | Farm 2       | Farm 3       | Farm 4       |
| <i>B. licheniformis</i>                    | 270<br>(90)                                         | 20<br>(100) |        | 190<br>(55.8) | 220<br>(66.7) | 60<br>(46.1) | 80<br>(33.3) | 160<br>(50)  |
| <i>B. circulans</i>                        |                                                     |             |        |               | 30<br>(9.1)   |              |              |              |
| <i>B. pumilus</i>                          | 20<br>(6.6)                                         |             |        |               |               | 20<br>(15.3) | 70<br>(29.2) |              |
| <i>B. altitudinis</i>                      |                                                     |             |        |               | 10<br>(3.03)  |              |              | 10<br>(3.1)  |
| <i>B. cereus</i>                           |                                                     |             |        |               |               |              | 10<br>(4.10) |              |
| <i>B. mycoides</i>                         |                                                     |             |        |               | 20<br>(6.10)  |              |              |              |
| <i>B. clausii</i>                          |                                                     |             |        | 50<br>(14.7)  | 10<br>(3.03)  |              | 50<br>(20.8) | 20<br>(6.25) |
| <i>B. simplex</i>                          |                                                     |             |        |               |               |              |              | 40<br>(12.5) |
| <i>B. kochii</i>                           |                                                     |             |        | 10<br>(2.9)   |               | 10<br>(7.7)  |              | 40<br>(12.5) |
| <i>B subtilis</i>                          |                                                     |             |        | 30<br>(8.8)   |               |              |              |              |
| <i>Paenibacillus spp</i>                   | 10<br>(3.3)                                         |             |        | 30<br>(8.8)   | 30<br>(9.1)   | 10<br>(7.7)  | 20<br>(8.3)  | 20<br>(6.25) |
| other aerobic spore forming <i>Bacilli</i> |                                                     |             |        | 30<br>(8.8)   | 10<br>(3.03)  | 30<br>(23)   | 10<br>(4.1)  | 30<br>(9.30) |
| Total count (CFU/mL)                       | 300                                                 | 20          | ND     | 340           | 330           | 130          | 240          | 320          |

Percentage depicts the prevalence of each bacterial species (identified by 16S rRNA sequencing) from the total number of colonies isolated from raw milk samples collected from each farm in each season.  
ND: not detected
